# Supplementary material for: Nitrogen and phosphorus doped polymer carbon dots as a sensitive cellular mapping probe of nitrite
Source: Royal Society of Chemistry journal article supplement (doi:10.1039/c8tb02998a), 2019-01-01
Supplement: c8tb02998a1.pdf [file c8tb02998a1.pdf]

## **Electronic Supplementary Information (ESI)**

*for*

### **Nitrogen and phosphorus doped polymer carbon dots as a sensitive cellular mapping probe of nitrite**

Yong Jian Jiang,<sup>a</sup> Min Lin,<sup>b</sup> Tong Yang,<sup>b</sup> Rong Sheng Li,<sup>b</sup> Cheng Zhi Huang,<sup>a, b</sup> Jian Wang<sup>b,\*</sup> and Yuan Fang Li<sup>a,\*</sup>

a. Key Laboratory of Luminescent and Real-Time Analytical Chemistry (Southwest University), Ministry of Education, College of Chemistry and Chemical Engineering, Southwest University, 400715 Chongqing, P.R. China. \*E-mail: liyf@swu.edu.cn, Tel: (+86) 23 68254659, Fax: (+86) 23 68367257.

b. Chongqing Key Laboratory of Biomedical Analysis (Southwest University), Chongqing Science & Technology Commission, College of Pharmaceutical Science, Southwest University, 400715 Chongqing, P.R. China . \*E-mail: wj123456@swu.edu.cn, Tel: (+86) 23 68254059, Fax: (+86) 23 68367257.

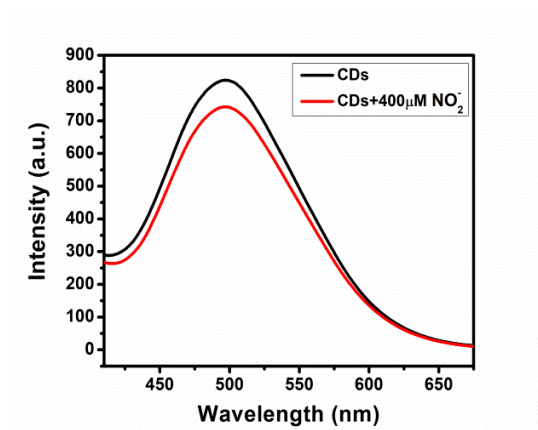

**Fig. S1** PL emission spectra of phosphorus-free carbon dots upon NO<sub>2</sub><sup>-</sup> (400 μM).

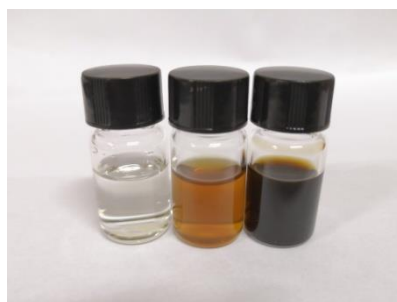

**Fig. S2** Photograph of PCDs after reaction for 0 h (left), 2h (middle) and 5h (right).

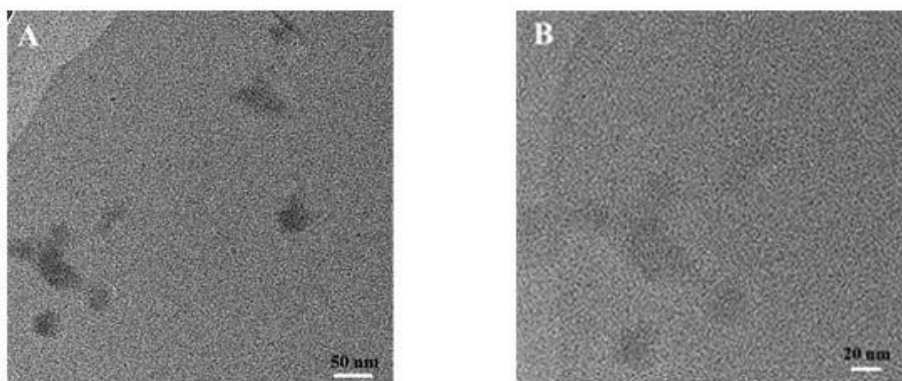

**Fig. S3** TEM images of PCDs after reaction for 2 h.

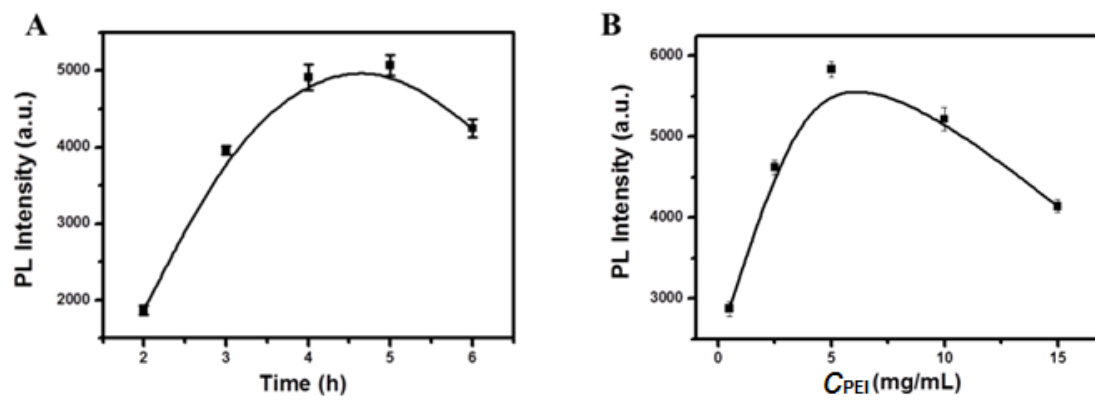

**Fig. S4** PL Intensities of PCDs with different reaction time (A) and concentrations of PEI (B).

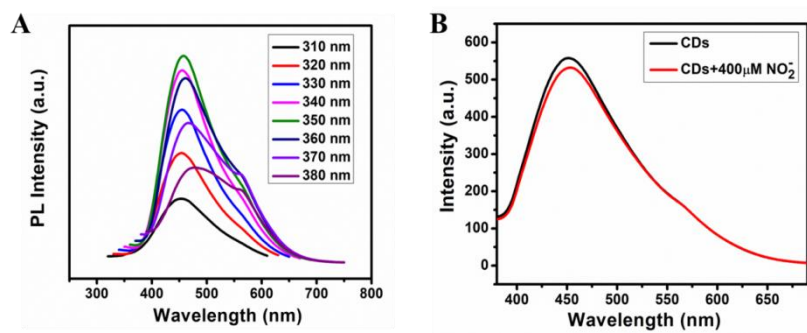

**Fig. S5** PL emission spectra of CDs. (A) The excitation-dependent property of CDs prepared with AA and H<sub>3</sub>PO<sub>4</sub> in the absence of PEI. (B) Fluorescence responses of CDs upon NO<sub>2</sub><sup>-</sup> (400 μM).

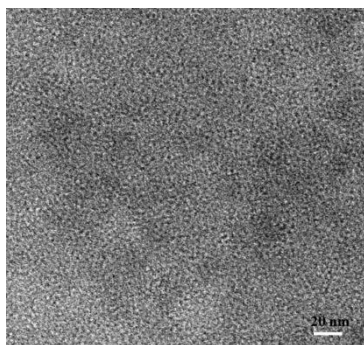

**Fig. S6** TEM images of products after reacting with PEI and  $\text{H}_3\text{PO}_4$  in the absence of AA. Scale bar: 20 nm.

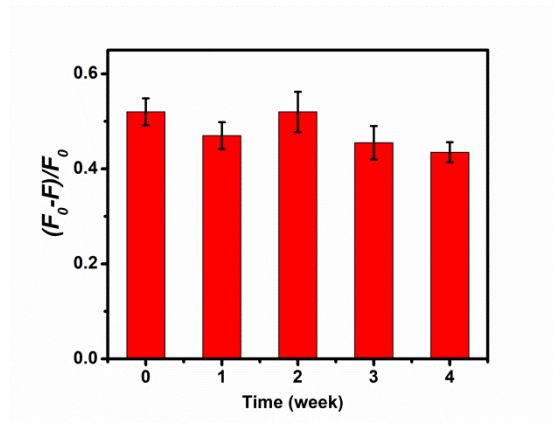

**Fig. S7** Stability of fluorescence response of PCDs to  $\text{NO}_2^-$  (100  $\mu\text{M}$ ) for four weeks.



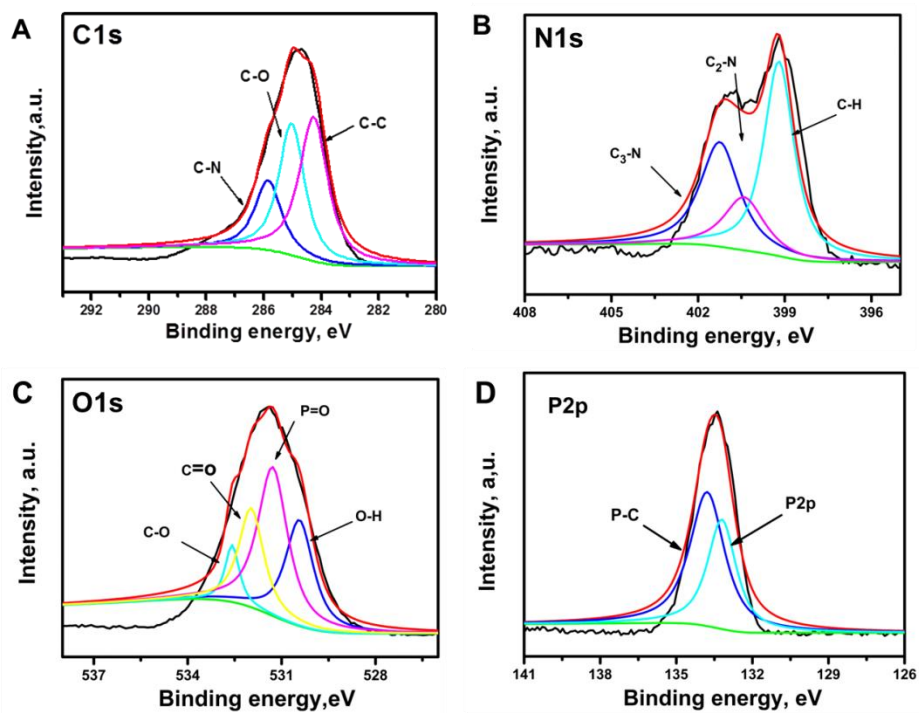

**Fig. S8** High-resolution XPS spectra of PCDs. (A) C1s spectra; (B) N1s spectra; (C) O1s spectra; (D) P2p spectra.

## 1. Measurement of fluorescence quantum yield

The quantum yield (QY) of PCDs was determined according to a procedure reported previously. In brief, quinine sulfate in 0.1 M H<sub>2</sub>SO<sub>4</sub> (QY: 54%) was chosen as a reference (refractive index  $\eta = 1.33$ ). The PCDs was dissolved in ultrapure water ( $\eta = 1.33$ ). The QY of the obtained PCDs was calculated using the following equation (1)<sup>1,2</sup>:

$$\phi_x = \phi_{st}(I_x / I_{st})(\eta_x^2 / \eta_{st}^2)(A_{st} / A_x) = \phi_{st}(k_x / k_{st})(\eta_x^2 / \eta_{st}^2)$$

Where  $\phi$  is the quantum yield,  $\eta$  is the refractive index of the solvent.  $I$  is the measured integrated emission intensity and  $A$  is the absorbance at the excitation wavelength.  $K_x$  and  $k_{st}$  is the slopes of CDs and quinine sulfate. To minimize reabsorption effects, absorbencies were kept under 0.1 at the excitation wavelength (350 nm). The QY of CDs was calculated to be 3.8 %.

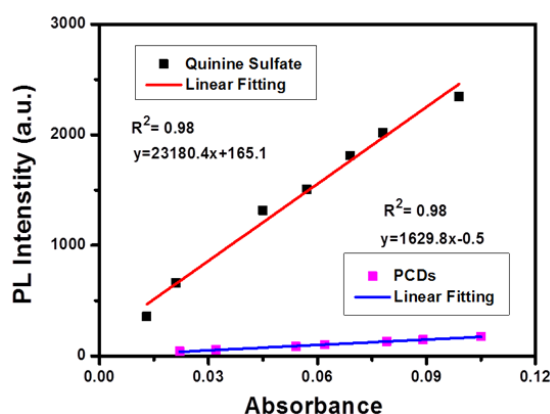

**Fig. S9** Linear fitting for quantum yield calculations of PCDs and quinine sulfate. PCDs were dissolved in ultrapure water while quinine sulfate was dissolved in 0.1mol/L H<sub>2</sub>SO<sub>4</sub>. All the PCDs and quinine sulfate solutions had absorbance less than 0.1 at the excitation wavelength (350 nm).

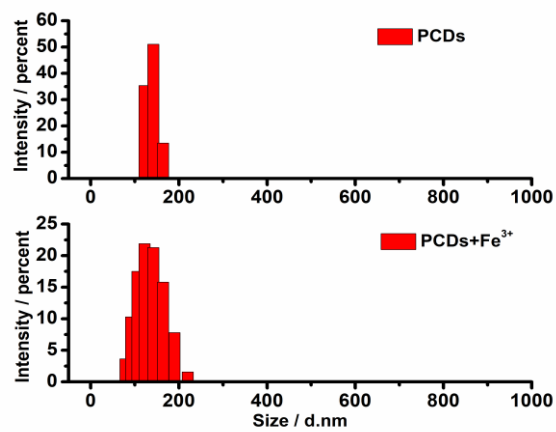

**Fig. S10** DLS of PCDs in the absence of Fe<sup>3+</sup> (top) and in the presence of Fe<sup>3+</sup> (bottom, 100 μM).

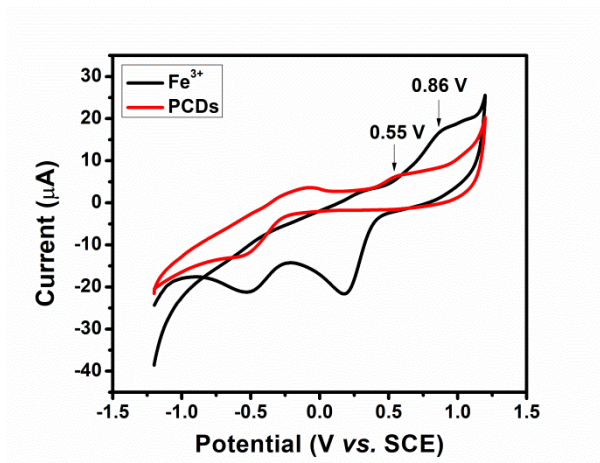

**Fig. S11** Cyclic voltammograms of Fe<sup>3+</sup> and PCDs.

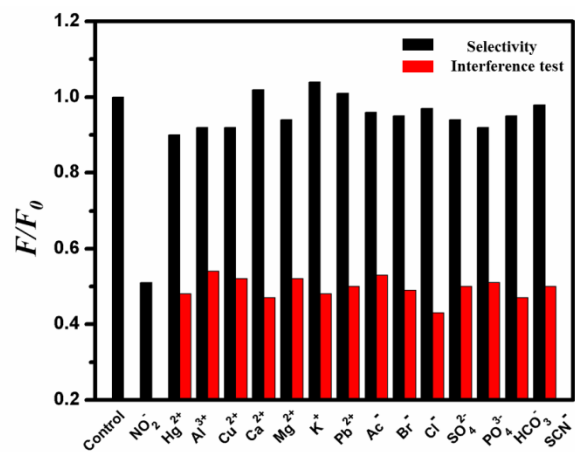

**Fig. S12** Selectivity (black bar) and interference test (red bar). The anti-interference tests are performed by the addition of NO<sub>2</sub><sup>-</sup> (100 μM) and other anions (500 μM).

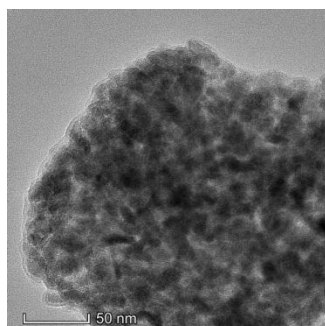

**Fig. S13** TEM image of PCDs in the presence  $\text{NO}_2^-$  ( $100 \mu\text{M}$ ).

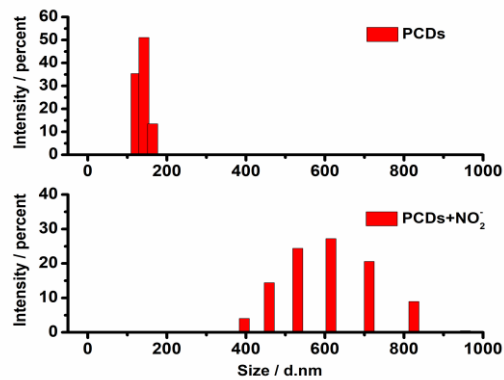

**Fig. S14** DLS of PCDs in the absence of NO<sub>2</sub><sup>-</sup> (top) and in the presence of NO<sub>2</sub><sup>-</sup> (bottom, 100 μM).

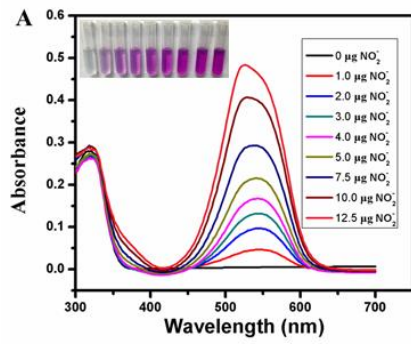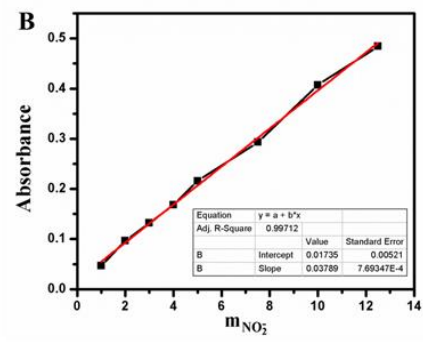

**Fig. S15** Griess-saltzman method. (A) The absorption intensities after diazo-reaction; (B) establishment of standard curve.



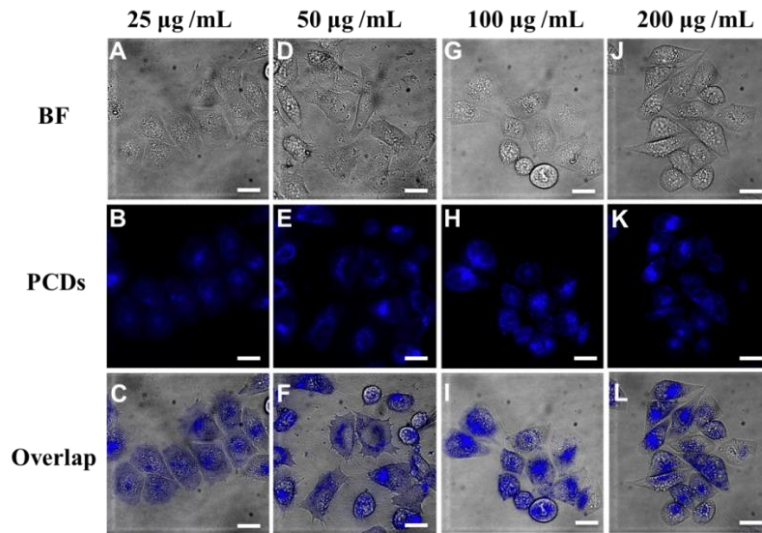

**Fig. S16** Cellular uptake of PCDs incubated with Hep-2 cells. The PCDs were incubated with HEP-2 cells for 2 h at different concentrations. Scale bars: 20  $\mu\text{m}$ .

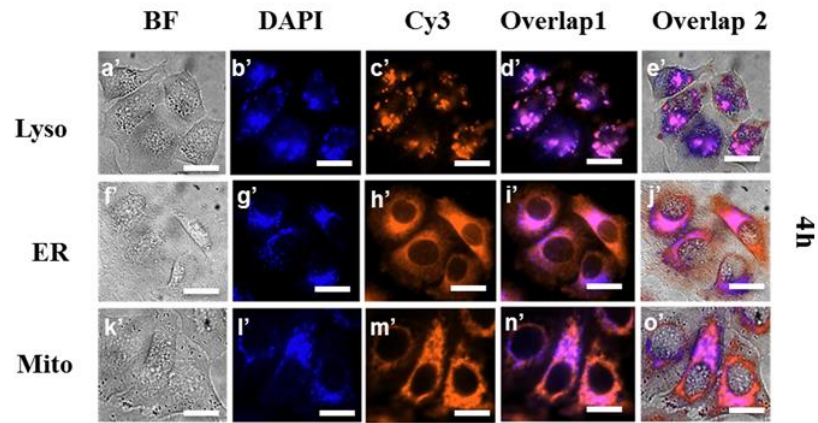

**Fig. S17** Internalization localization of PCDs with different acid organelles after incubation for 4h. (a'-e') PCDs co-localized with LysoTracker red; (f'-j') co-localized with ER tracker used to label the endoplasmic reticulum; (k'-o') co-localized with MitoTracker used to label the mitochondria; Scale bars: 10  $\mu$ m. DAPI and Cy3 channel indicate the presence of PCDs and fluorescent dyes, respectively.

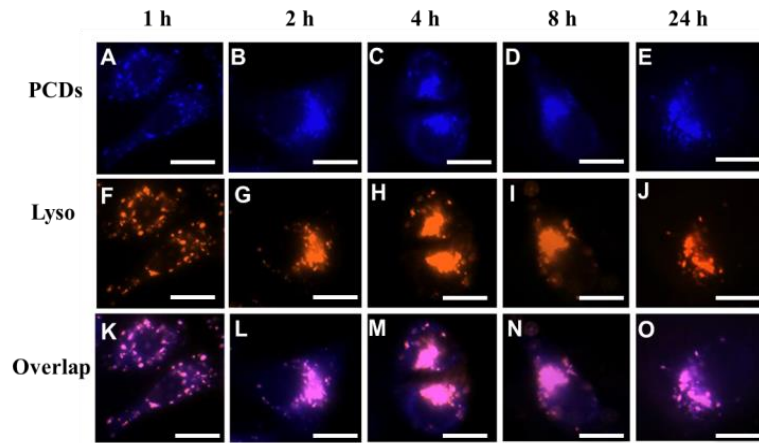

**Fig. S18** The fluorescence imaging of subcellular co-localization between PCDs and LysoTracker under various incubation (1h, 2h, 4h, 8h and 24 h). Scale bars: 10  $\mu$ m. Blue and orange indicate the presence of PCDs and Lyso Tracker, respectively.

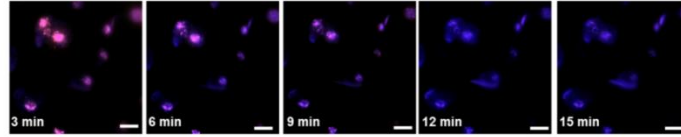

**Fig. S19** The photo-stability of PCDs in Hep-2 cells compared with commercial lysosomal dyes. The cells labelled by PCDs and LysoTracker and exposure under confocal lasers for 15 min. It was found that the PL of LysoTracker disappeared after 12 min exposure while the PCDs maintain the beginning PL intensity. Scale bars: 20  $\mu\text{m}$

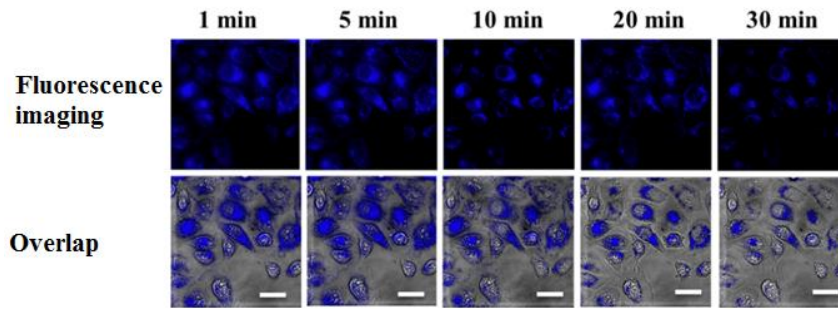

**Fig. S20** The confocal microscopy images of Hep-2 cells treated with PCDs and 20  $\mu$ M nitrite at different time intervals.

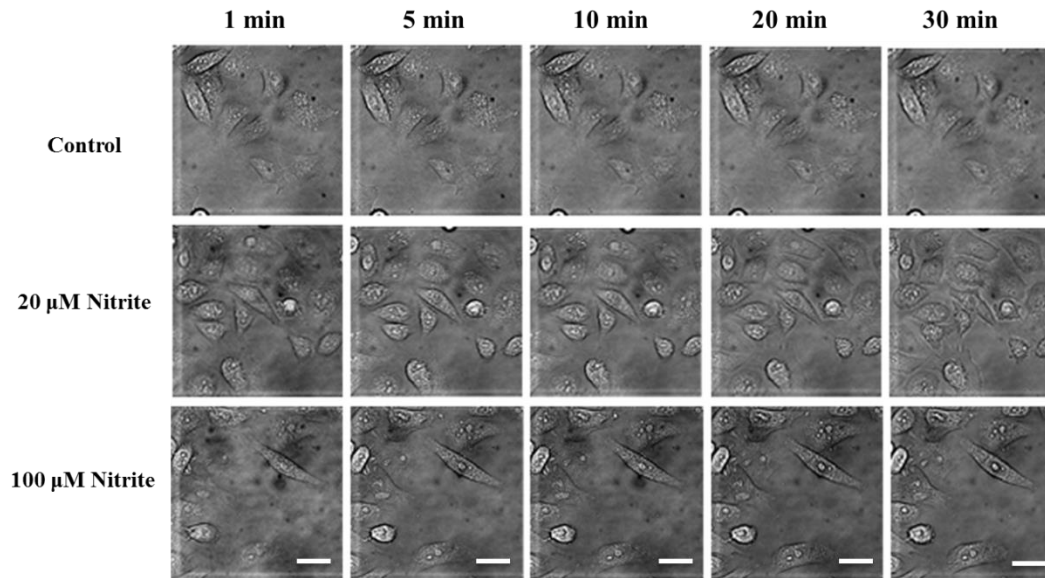

**Fig. S21** Images of Hep-2 cells under bright field after incubation with PCDs and different concentrations of  $\text{NO}_2^-$  at different time intervals. Scale bars: 20  $\mu\text{m}$

## 2. Calculation of fluorescence lifetime.

Average fluorescence lifetime of CDs was calculated according to Equation (2):<sup>3</sup>

$$\bar{\tau} = \frac{A_1\tau_1 + A_2\tau_2 + A_3\tau_3}{A_1 + A_2 + A_3}$$

**Table S1.** The fluorescence lifetime of PCDs and after added various concentrations of nitrites.

|                            | <b>A<sub>1</sub>τ<sub>1</sub></b> | <b>A<sub>2</sub>τ<sub>2</sub></b> | <b>A<sub>3</sub>τ<sub>3</sub></b> | <b><math>\bar{\tau}</math></b> |
|----------------------------|-----------------------------------|-----------------------------------|-----------------------------------|--------------------------------|
| PCDs                       | 1.73                              | 0.11                              | 4.81                              | 6.65                           |
| PCDs+10 μMNO <sub>2</sub>  | 1.62                              | 1.9                               | 2.34                              | 5.86                           |
| PCDs+40 μM NO <sub>2</sub> | 1.06                              | 1.89                              | 2.14                              | 5.09                           |
| PCDs+100μM NO <sub>2</sub> | 1.6                               | 0.71                              | 1.62                              | 3.93                           |

### 3. Determination of NO<sub>2</sub> in milk samples and tap water.

The milk samples were purchased from Chongqing Yonghui Market. The pretreatment procedure of samples and the establishment of the standard curve referenced to GB (5009. 33-2016) of National food safety standard.

**Table S2.** The recovery rate of nitrites in real samples.

| Sample    | Proposed<br>method 10 <sup>-6</sup> M | Comparison<br>method 10 <sup>-6</sup> M | Nitrite<br>spiked 10 <sup>-6</sup> M | Found<br>10 <sup>-6</sup> M | Recovery (%) |
|-----------|---------------------------------------|-----------------------------------------|--------------------------------------|-----------------------------|--------------|
| milk      | -                                     | -                                       | 8.0                                  | 8.1 ± 0.66                  | 101.3%       |
| Tap water | -                                     | -                                       | 8.0                                  | 7.6 ± 0.21                  | 94.6%        |



**Table S3.** Comparison of NO<sub>2</sub><sup>-</sup> detection between this work and other carbon dots

| Carbon dots | Methods           | Sample                     | Linear range                                  | Detection limit        | Reference |
|-------------|-------------------|----------------------------|-----------------------------------------------|------------------------|-----------|
| PCDs        | Fluorescence      | Milk/water/<br>living cell | 2 μM-100 μM                                   | 0.55 μM                | This work |
| N-CNDs      | Fluorescence      | Water                      | 0–1.0 mM.                                     | 1.0 μM                 | 4         |
| N,P-GQDs    | Fluorescence      | Living cell                | 5-30 nM                                       | 2.5 nM                 | 5         |
| Carbon dots | Chemiluminescence | Milk/<br>water             | 1.0×10 <sup>-7</sup> M-1.0×10 <sup>-5</sup> M | 5.3×10 <sup>-8</sup> M | 6         |
| Carbon dots | Chemiluminescence | Water                      | 1.0×10 <sup>-7</sup> M-1.0×10 <sup>-5</sup> M | 5.0×10 <sup>-9</sup> M | 7         |
| CDs-Au-N    | Electrochemical   | Water                      | 0.1 μM–2000 μM                                | 0.06 μM                | 8         |

**Table S4** Comparison of NO<sub>2</sub><sup>-</sup> detection between this work and other reported probes

| Probes                                     | Sample                 | Response type | Emission wavelength | Detection limit         | Reference |
|--------------------------------------------|------------------------|---------------|---------------------|-------------------------|-----------|
| PCDs                                       | Milk/water/living cell | on-off        | 487 nm              | 0.55 μM                 | This work |
| Rh 6G-SiO <sub>2</sub>                     | -                      | on-off        | 551 nm              | 1.2 μM                  | 9         |
| AuNCs                                      | Water                  | on-off        | 670 nm              | 1.0 nM                  | 10        |
| PPESO <sub>3</sub>                         | -                      | on-off        | 530 nm              | 0.62 μM                 | 11        |
| Rhodamine based fluorogenic chemodosimeter | Water                  | off-on        | 585 nm              | 1.0×10 <sup>-7</sup> M  | 12        |
| PCNs                                       | Water/soil/milk        | off-on        | 520 nm              | 2.32×10 <sup>-9</sup> M | 13        |
| UCNPs                                      | Water/food             | ratiometric   | 539 nm /<br>654 nm  | 4.67 μM                 | 14        |

#### 4. Notes and references

1. L. X. Lin and S. W. Zhang, *Chem. Commun.*, 2012, **48**, 10177-10179.
2. J. G. Zhou, C. Booker, R. Y. Li, X. T. Zhou, T. K. Sham, X. L. Sun and Z. F. Ding, *J. Am. Chem. Soc.*, 2007, **129**, 744-745.
3. Z. L. Wu, M. X. Gao, T. T. Wang, X. Y. Wan, L. L. Zheng and C. Z. Huang, *Nanoscale*, 2014, **6**, 3868-3874.
4. H. M. Zhang, S. H. Kang, G. Z. Wang, Y. X. Zhang and H. J. Zhao, *ACS Sens.*, 2016, **1**, 875-881.
5. R. J. Liu, J. J. Zhao, Z. R. Huang, L. L. Zhang, M. B. Zou, B. F. Shi and S. L. Zhao, *Sensor. Actuat. B-Chem.*, 2017, **240**, 604-612.
6. Z. Lin, W. Xue, H. Chen and J. M. Lin, *Anal. Chem.*, 2011, **83**, 8245-8251.
7. Z. Lin, X. N. Dou, H. F. Li, Y. Ma and J. M. Lin, *Talanta*, 2015, **132**, 457-462.
8. Z. J. Zhuang, H. Q. Lin, X. Zhang, F. Qiu and H. Y. Yang, *Microchim. Acta*, 2016, **183**, 2807-2814.
9. L. L. Wang, B. Li, L. M. Zhang, L. G. Zhang and H. F. Zhao, *Sensor. Actuat. B-Chem.*, 2012, **171-172**, 946-953.
10. H. Y. Liu, G. H. Yang, E.S. Abdel-Halim and J. J. Zhu, *Talanta*, 2013, **104**, 135-139.
11. T. Zhang, H. L. Fan and Q. H. Jin, *Talanta*, 2010, **81**, 95-99.
12. V. Kumar, M. Banerjee, and A. Chatterjee, *Talanta*, 2012, **99**, 610-615.
13. S. Menon, A. E. Vikraman, S. Jesny, K. G. Kumar, *J. Fluoresc.*, 2016, **26**, 129-134.
14. J. F. Han, C. Zhang, F. Liu, B. H. Liu, M. Y. Han, W. S. Zou, L. Yang and Z. P. Zhang, *Analyst.*, 2014, **139**, 3032-3038.
